# Supplementary material for: An Antibody-Drug Conjugate That Selectively Targets Human Monocyte Progenitors for Anti-Cancer Therapy
Source: PubMed Central journal article supplement (PMC7937628; doi:10.3389/fimmu.2021.618081), 2021-02-22
Supplement: Table_1.pdf [file Table_1.pdf]

**Supplementary Table 1** | Each BM sample was transplanted into two mice, which were for H22-dPBD and DNP-dPBD-treatment. Chimerisms in PB and BM of DNP-dPBD-treated group were examined before and 1 week after ADC-treatment, respectively. PDX mice derived from P#1 and P#4-6 patients were used for the experiments in Figure 5.

| Patient |     |     |           |                          |           | PDX mouse    |              |             |
|---------|-----|-----|-----------|--------------------------|-----------|--------------|--------------|-------------|
| ID      | Age | Sex | Diagnosis | Karyotype                | Treatment | PB chimerism | BM chimerism | Engraftment |
| P#1     | 77  | M   | CMML-2    | normal                   | no        | 5.4%         | 49.4%        | yes         |
| P#2     | 79  | F   | CMML-2    | normal                   | no        | 1.7%         | 48.5%        | yes         |
| P#3     | 67  | M   | CMML-2    | 47, XY, +8[18]/46, XY[2] | no        | 0.0%         | 0.2%         | no          |
| P#4     | 79  | M   | CMML-2    | normal                   | no        | 2.3%         | 32.7%        | yes         |
| P#5     | 73  | F   | CMML-0    | undeterminable           | no        | 0.3%         | 11.6%        | yes         |
| P#6     | 88  | M   | CMML-1    | normal                   | no        | 4.3%         | 56.3%        | yes         |
